# Supplementary material
Source: MDPI journal article supplement (https://www.mdpi.com/2071-1050/13/9/4648)
Supplement: s1 [file s1]

**Table S1.** The statistical parameters of the data used in the study.

|                                        | Guangyuan  |          |       | Beibei     |          |       |
|----------------------------------------|------------|----------|-------|------------|----------|-------|
|                                        | Whole data | Training | Test  | Whole data | Training | Test  |
| <b>Streamflow (Q), m<sup>3</sup>/s</b> |            |          |       |            |          |       |
| <b>Mean</b>                            | 175        | 171      | 179   | 2138       | 2027     | 2249  |
| <b>Min.</b>                            | 4.5        | 16.2     | 4.5   | 105        | 105      | 276   |
| <b>Max</b>                             | 6290       | 6290     | 3780  | 34700      | 30600    | 34700 |
| <b>Median</b>                          | 77.7       | 69.5     | 85.6  | 1080       | 975      | 1190  |
| <b>Skewness</b>                        | 6.8        | 7.6      | 5.3   | 4.3        | 4.4      | 4.2   |
| <b>Std. dev.</b>                       | 336        | 366      | 304   | 3232       | 3061     | 3393  |
| <b>Sediment (S), kg/s</b>              |            |          |       |            |          |       |
| <b>Mean</b>                            | 432        | 409      | 454   | 972        | 938      | 1007  |
| <b>Min.</b>                            | 0          | 0        | 0.35  | 0.11       | 0.11     | 0.79  |
| <b>Max</b>                             | 49600      | 49600    | 43500 | 86500      | 86500    | 11300 |
| <b>Median</b>                          | 12.7       | 12.8     | 12.6  | 10.8       | 9.8      | 12.1  |
| <b>Skewness</b>                        | 12         | 13.5     | 9.7   | 10.5       | 10.3     | 10.7  |
| <b>Std. dev.</b>                       | 2675       | 2844     | 2496  | 5685       | 5591     | 5781  |

**Table S2.** Performance of the best ANFIS, M5Tree, MARS and MARS-KM models in sediment prediction at Guangyuan Station

| Statistics | Data set                      | ANFIS        | M5Tree       | MARS         | MARS-KM      |
|------------|-------------------------------|--------------|--------------|--------------|--------------|
| RMSE       | 1 <sup>st</sup> training-test | 1649         | 1428         | 1225         | 1003         |
|            | 2 <sup>nd</sup> training-test | 1677         | 1651         | 1399         | 1282         |
|            | <b>Mean</b>                   | <b>1663</b>  | <b>1540</b>  | <b>1312</b>  | <b>1143</b>  |
| MAE        | 1 <sup>st</sup> training-test | 340          | 249          | 265          | 187          |
|            | 2 <sup>nd</sup> training-test | 323          | 269          | 217          | 167          |
|            | <b>Mean</b>                   | <b>332</b>   | <b>259</b>   | <b>241</b>   | <b>177</b>   |
| NSE        | 1 <sup>st</sup> training-test | 0.563        | 0.672        | 0.759        | 0.838        |
|            | 2 <sup>nd</sup> training-test | 0.652        | 0.663        | 0.758        | 0.797        |
|            | <b>Mean</b>                   | <b>0.608</b> | <b>0.668</b> | <b>0.759</b> | <b>0.818</b> |

**Table S3.** Performance of the best ANFIS, M5Tree, MARS and MARS-KM models in sediment prediction at Beibei Station

| Statistics | Data set                      | ANFIS        | M5Tree       | MARS         | MARS-KM      |
|------------|-------------------------------|--------------|--------------|--------------|--------------|
| RMSE       | 1 <sup>st</sup> training-test | 3591         | 3221         | 3265         | 2377         |
|            | 2 <sup>nd</sup> training-test | 2668         | 2953         | 2650         | 2478         |
|            | <b>Mean</b>                   | <b>3130</b>  | <b>3087</b>  | <b>2958</b>  | <b>2428</b>  |
| MAE        | 1 <sup>st</sup> training-test | 715          | 495          | 575          | 434          |
|            | 2 <sup>nd</sup> training-test | 474          | 451          | 462          | 367          |
|            | <b>Mean</b>                   | <b>595</b>   | <b>473</b>   | <b>519</b>   | <b>401</b>   |
| NSE        | 1 <sup>st</sup> training-test | 0.614        | 0.689        | 0.681        | 0.831        |
|            | 2 <sup>nd</sup> training-test | 0.772        | 0.721        | 0.775        | 0.803        |
|            | <b>Mean</b>                   | <b>0.693</b> | <b>0.705</b> | <b>0.728</b> | <b>0.817</b> |

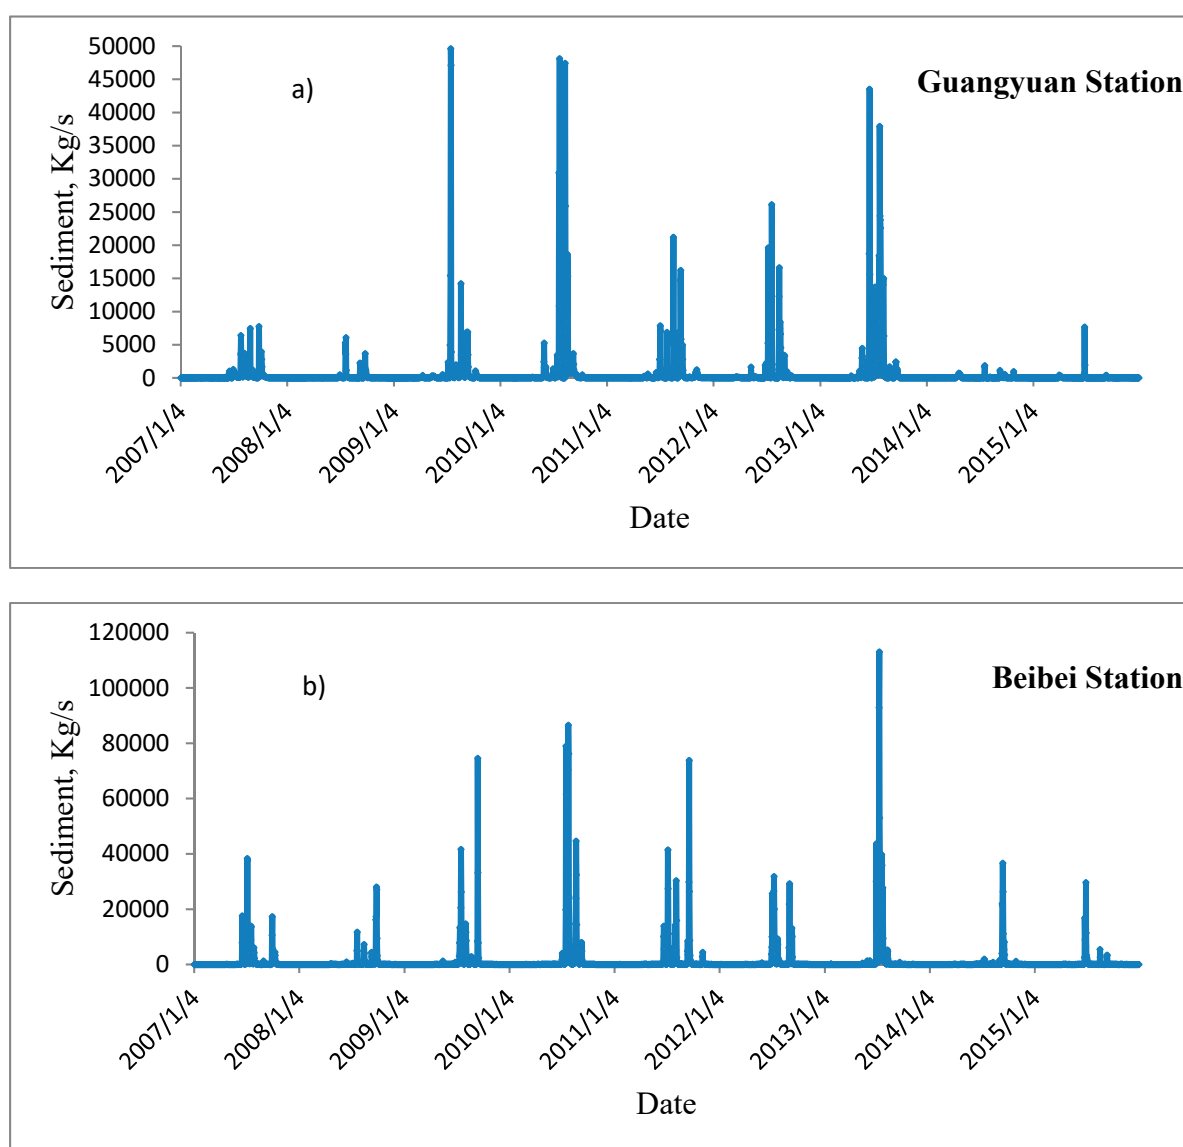**Figure S1.** Time variation graph of sediment load for a) Guangyuan and b) Beibei Station

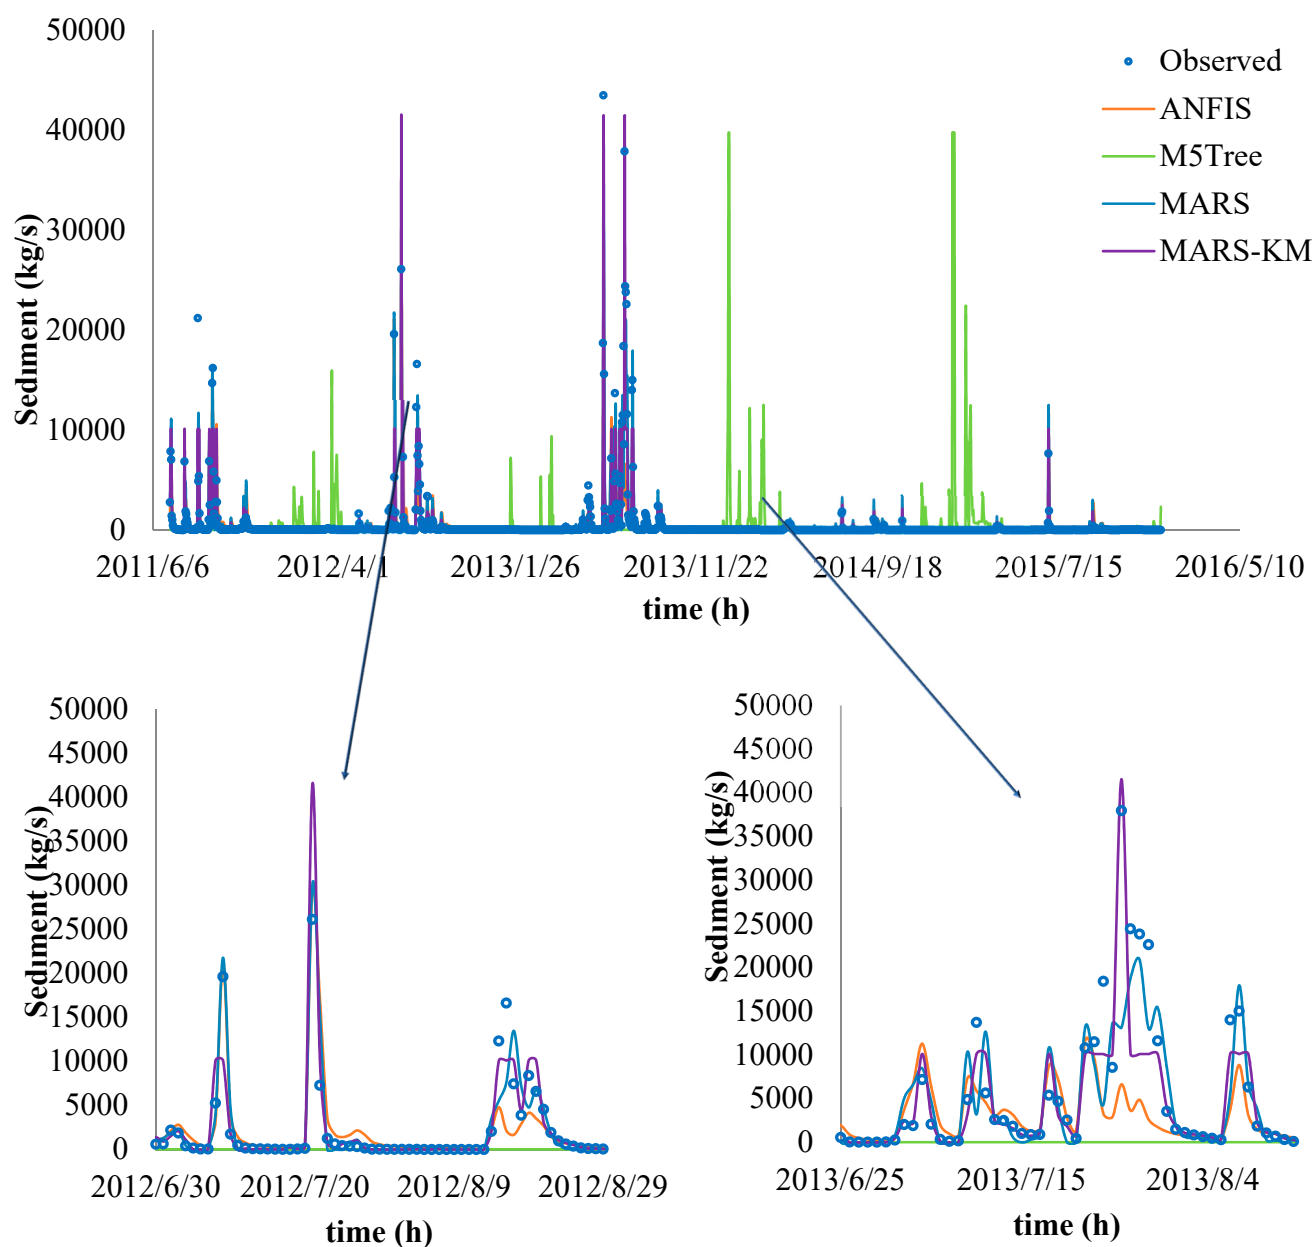

**Figure S2.** Time variation graphs of the observed and estimated sediments by ANFIS, M5Tree, MARS and MARS-KM models in the test period at Guangyuan Station for the 1<sup>st</sup> training-test scenario

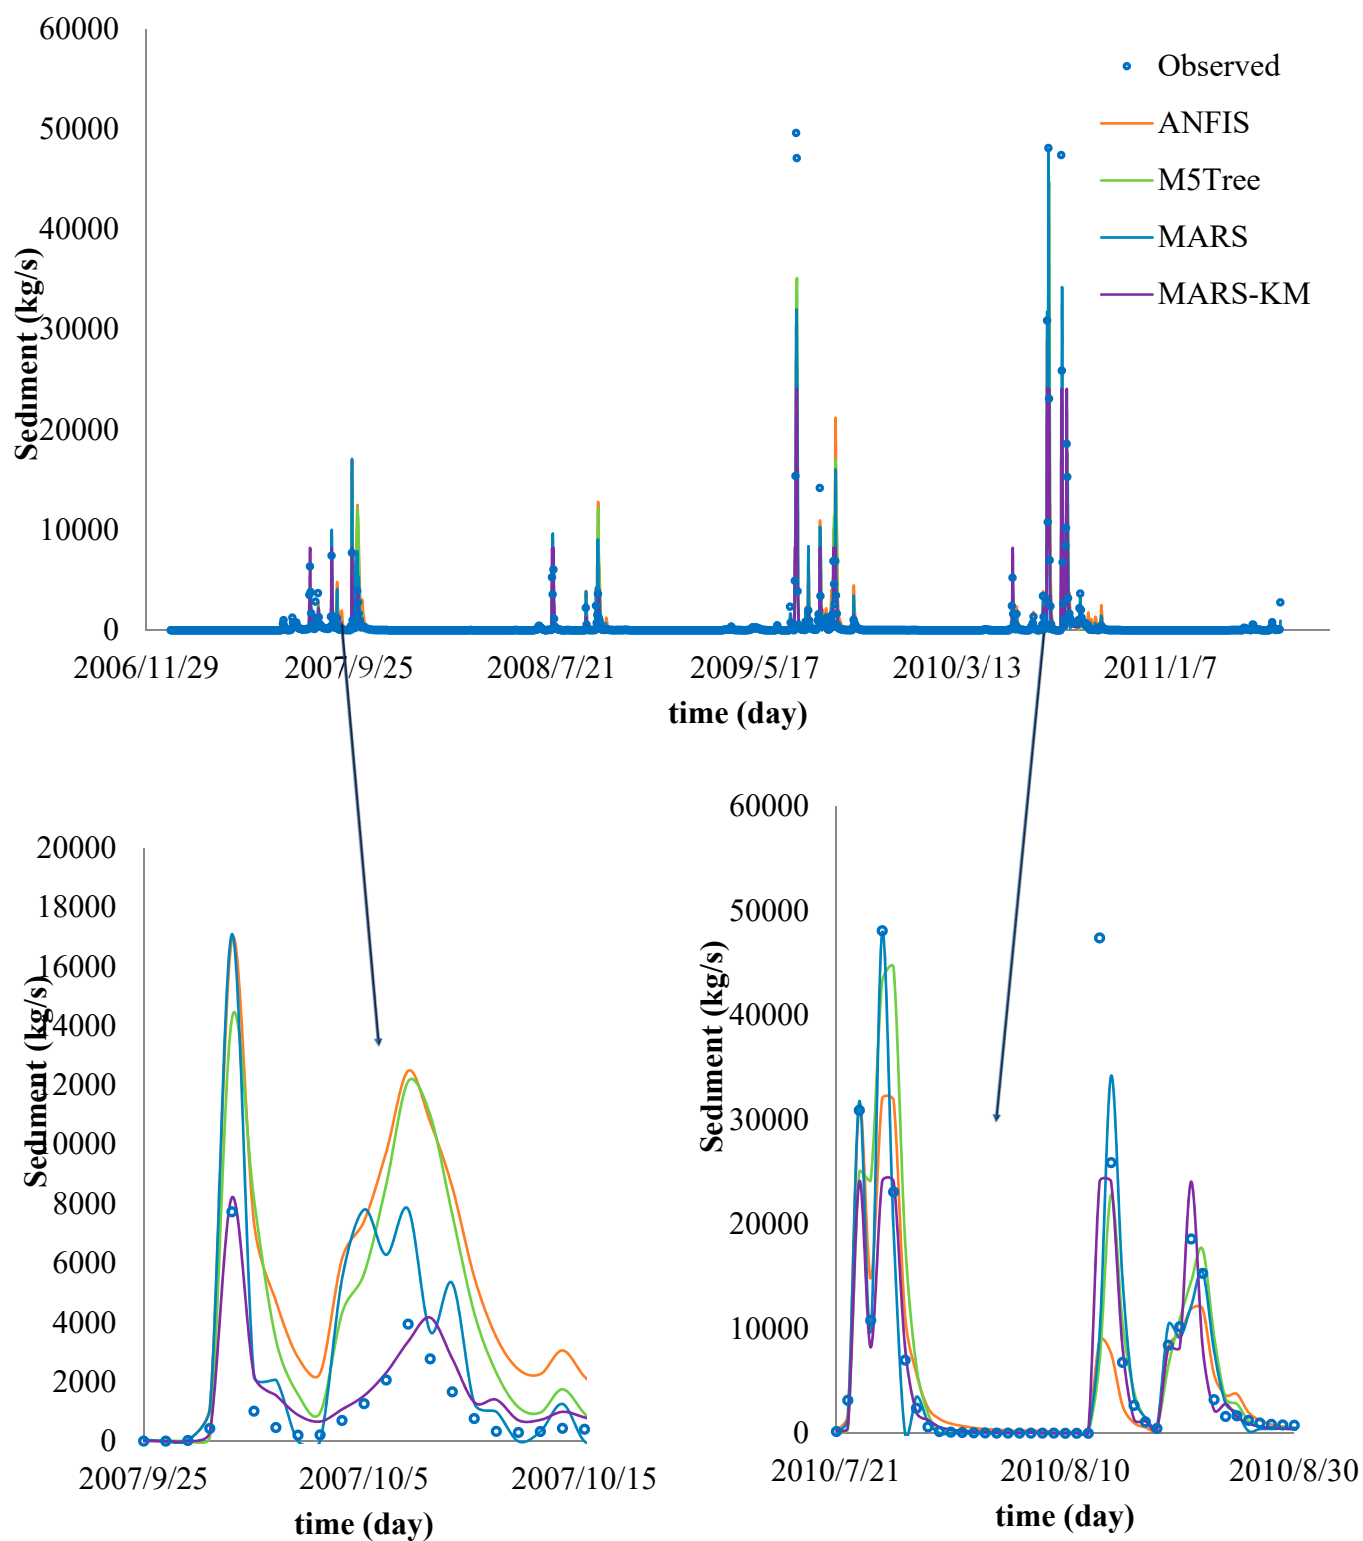

**Figure S3.** Time variation graphs of the observed and estimated sediments by ANFIS, M5Tree, MARS and MARS-KM models in the test period at Guangyuan Station for the 2<sup>nd</sup> training-test scenario

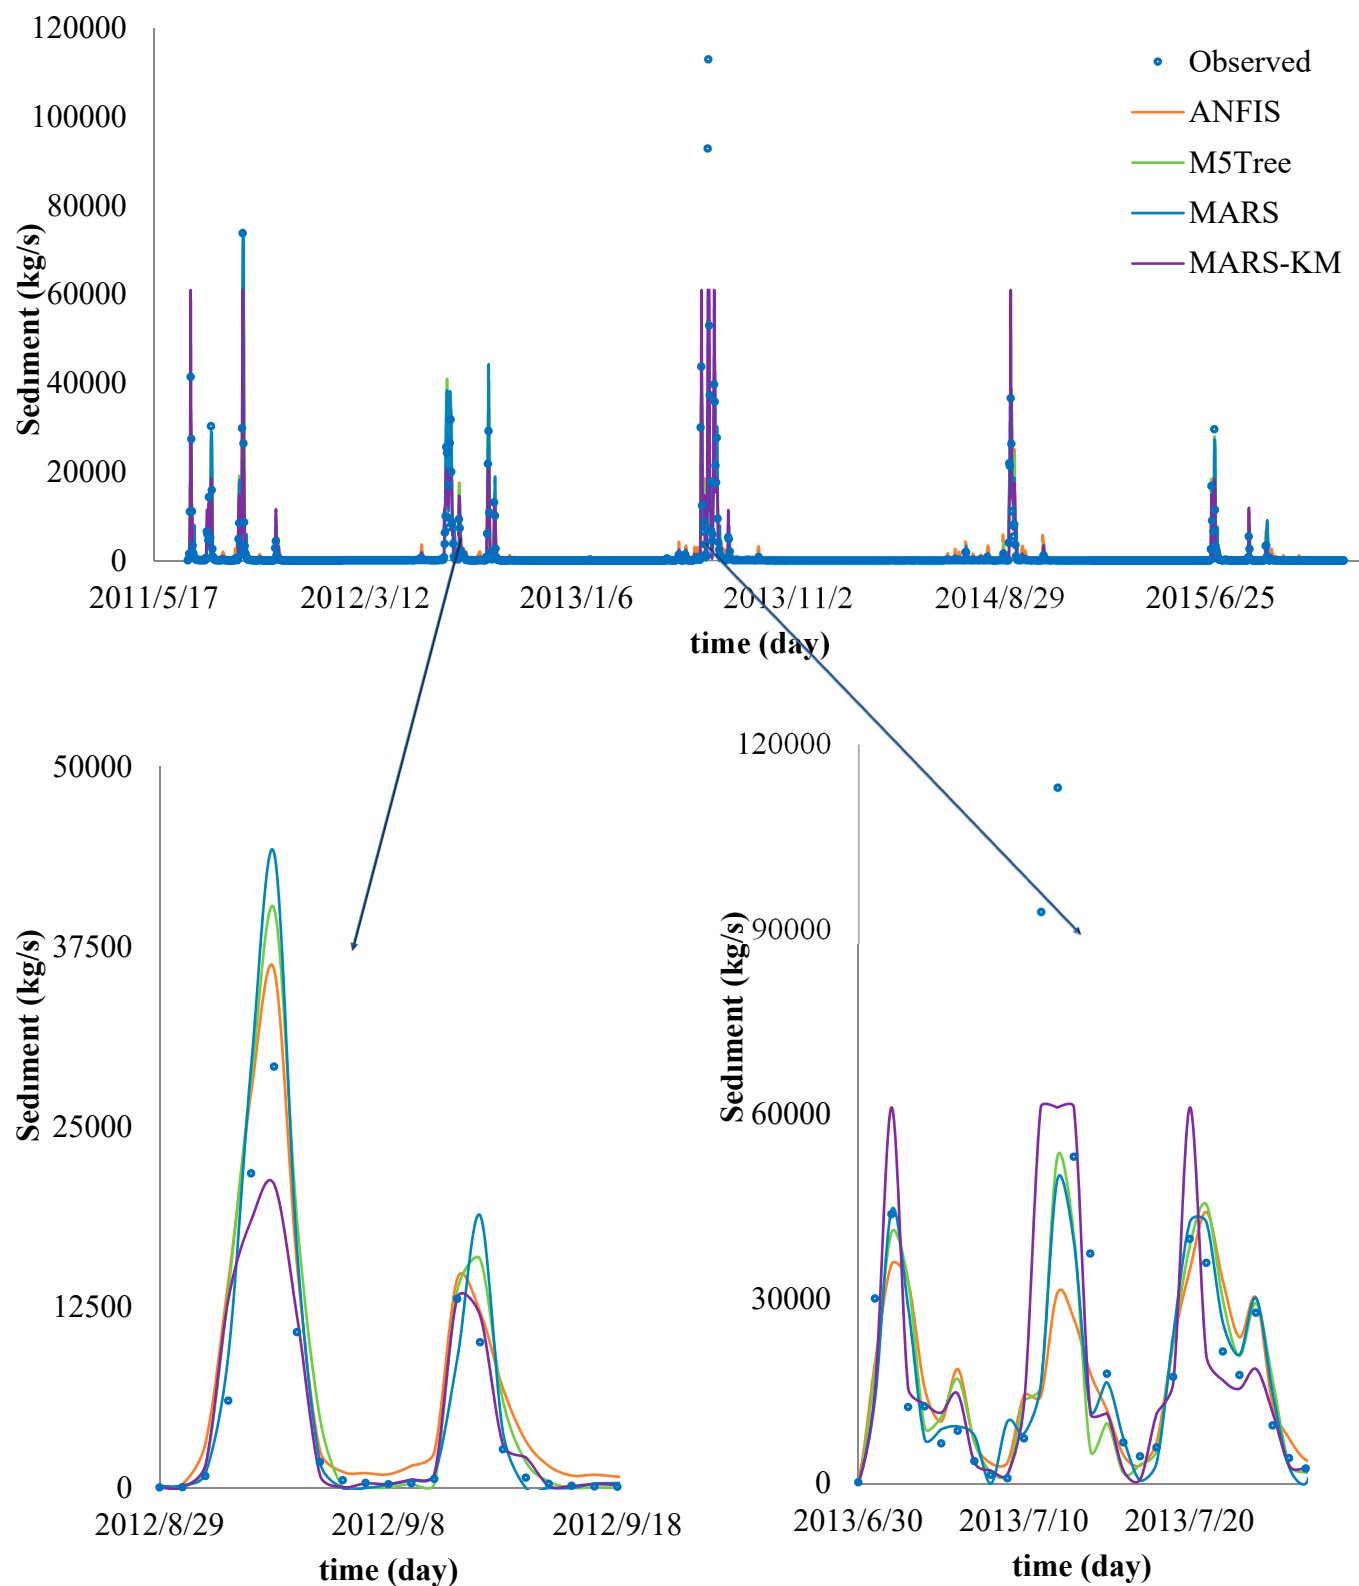

**Figure S4.** Time variation graphs of the observed and estimated sediments by ANFIS, M5Tree, MARS and MARS-KM models in the test period of Beibei Station – 1<sup>st</sup> training-test scenario

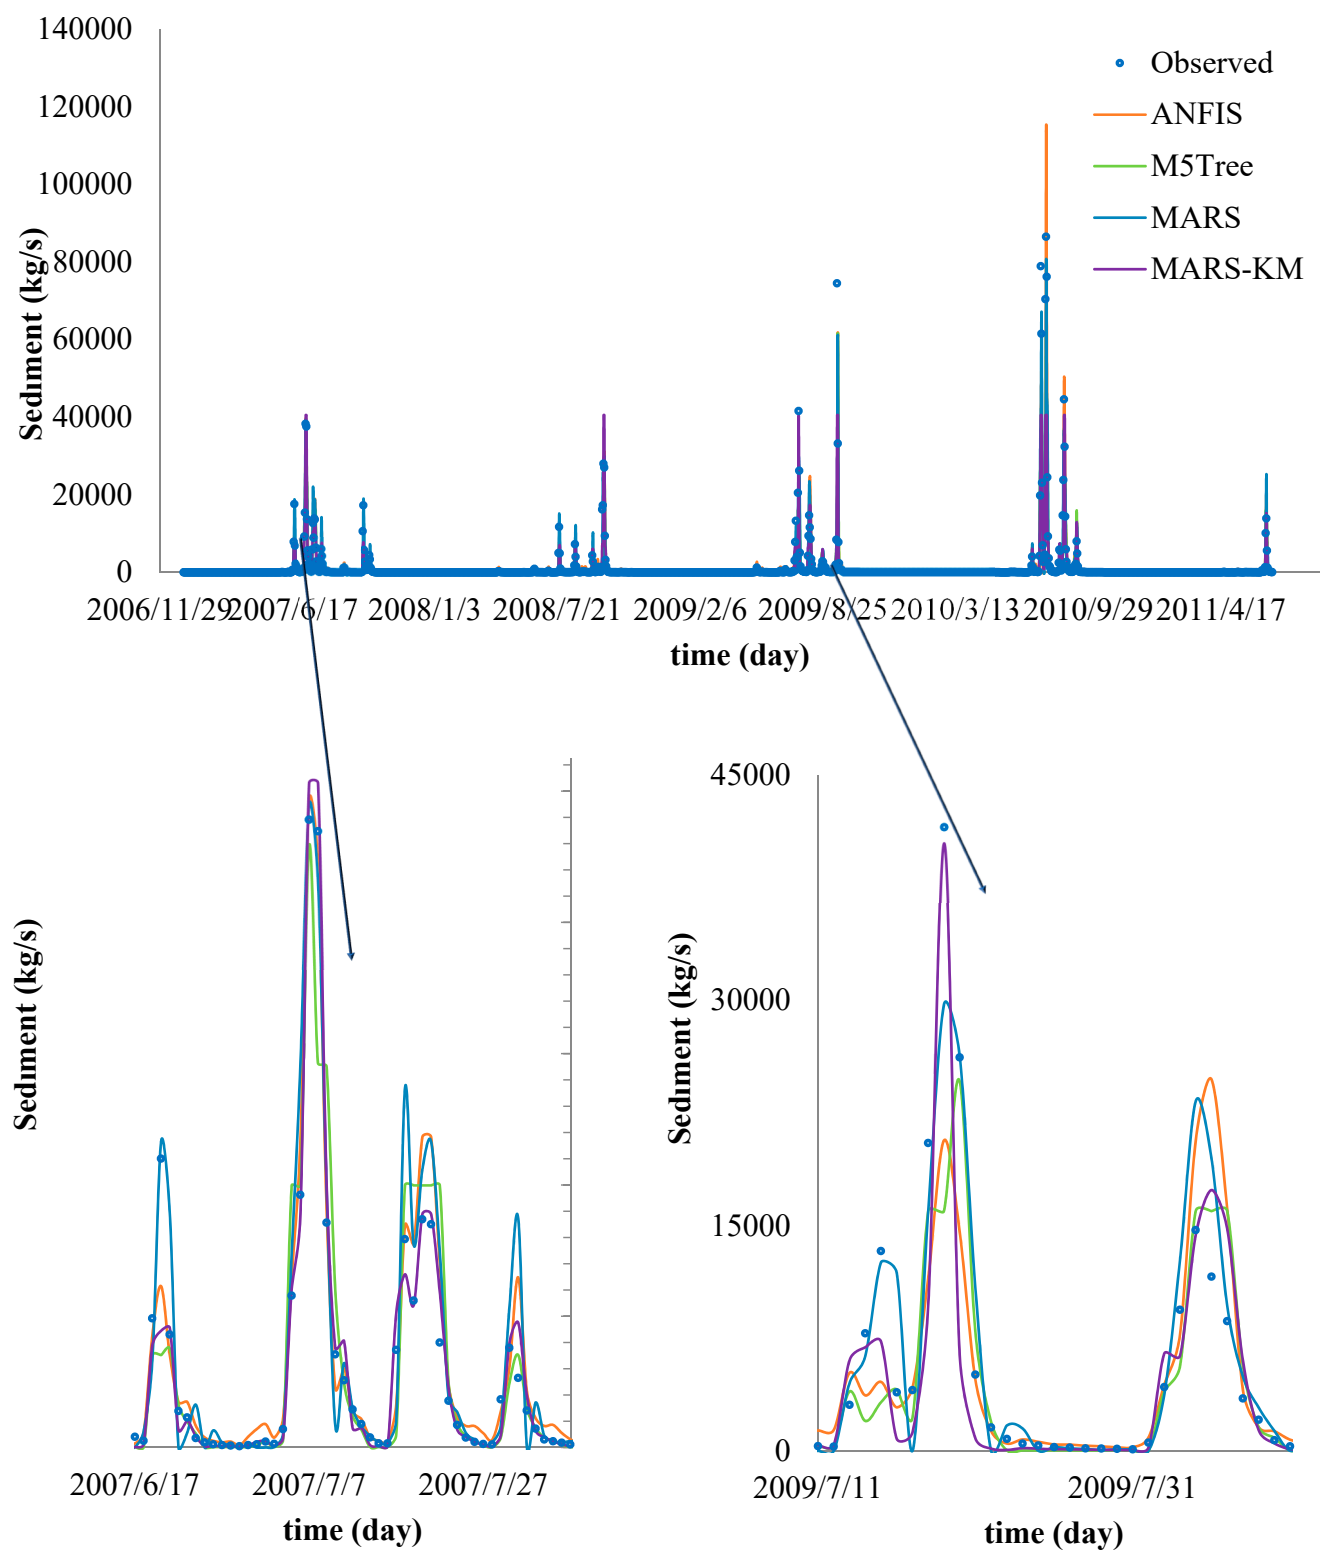

**Figure S5.** Time variation graphs of the observed and estimated sediments by ANFIS, M5Tree, MARS and MARS-KM models in the test period at Beibei Station for the 2<sup>nd</sup> training-test scenario
